# Supplementary material for: Kinetic and reactivity of gas-phase reaction of acyclic dienes with hydroxyl radical in the 273–318 K temperature range
Source: Royal Society of Chemistry journal article supplement (doi:10.1039/d3ra08750f), 2024-01-01
Supplement: d3ra08750f1.pdf [file d3ra08750f1.pdf]

## Kinetic and reactivity of gas-phase reaction of acyclic dienes with hydroxyl radical in the 273-318 K temperature range

Chenyang Xue<sup>a,b</sup>, Xinmiao Xu<sup>b,c</sup>, Han Lyu<sup>d</sup>, Yunfeng Li<sup>e</sup>, Yangang Ren<sup>b,c\*</sup>, Jinhe Wang<sup>d</sup>,  
Yujing Mu<sup>b,c</sup>, Abdelwahid Mellouki<sup>f,g</sup>, Zongzheng Yang<sup>a\*</sup>

<sup>a</sup> College of Marine and Environmental Sciences, Tianjin University of Science & Technology, Tianjin 300457, China

<sup>b</sup> Laboratory of Atmospheric Environment and Pollution Control (LAEPC), Research Center for Eco-Environmental Sciences, Chinese Academy of Sciences; Beijing 100085, China

<sup>c</sup> College of Resources and Environment, University of Chinese Academy of Sciences; Beijing 100049, China

<sup>d</sup> School of Municipal and Environmental Engineering, Shandong Jianzhu University, Jinan 250101, China

<sup>e</sup> School of Mechanical Engineering, Beijing Institute of Petrochemical Technology, Beijing 102617, China

<sup>f</sup> Mohammed VI Polytechnic University Lot 660, Hay Moulay Rachid Ben Guerir, 43150, Morocco

<sup>g</sup> Institut de Combustion Aérothermique Réactivité et Environnement/OSUC-CNRS, 45071 Orléans Cedex 2, France

\* Corresponding to: yzz320@tust.edu.cn (Zongzheng Yang) (Zongzheng Yang);  
ygren@rcees.ac.cn (Yangang Ren)

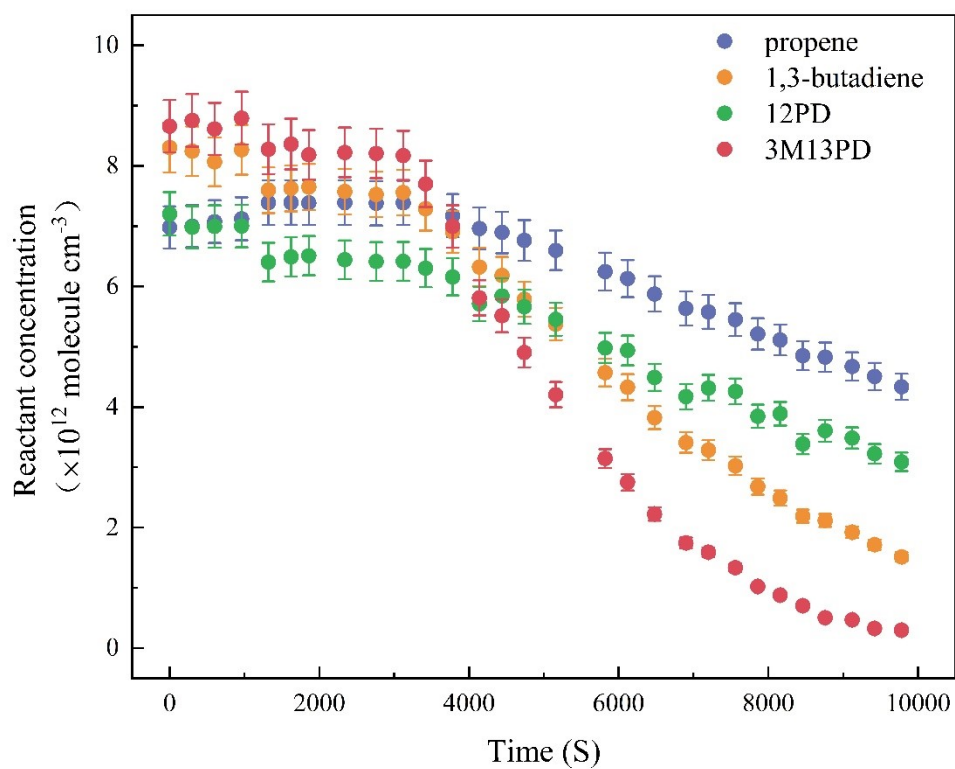

**Fig S1.** Example of plots of reactant consumption versus reaction time in the case of photolysis of hydrogen peroxide, the error bar was estimated from the uncertainty of GC-PID as 5%.

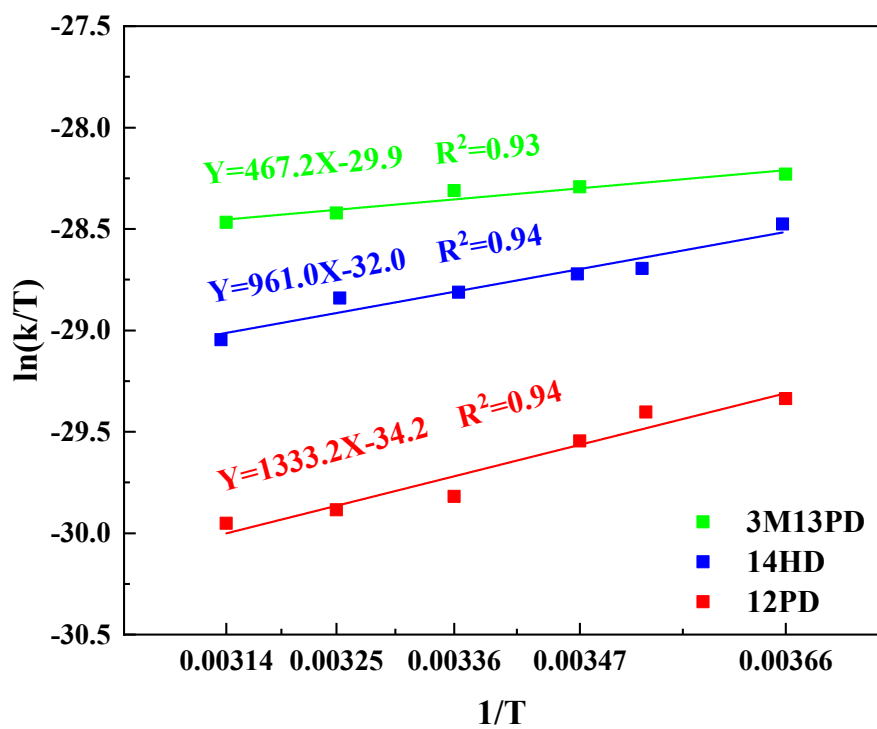

**Fig S2.** Eyring plots showing temperature dependence behavior of the reaction of 3M13PD, 14HD and 12PD with  $\cdot\text{OH}$ .

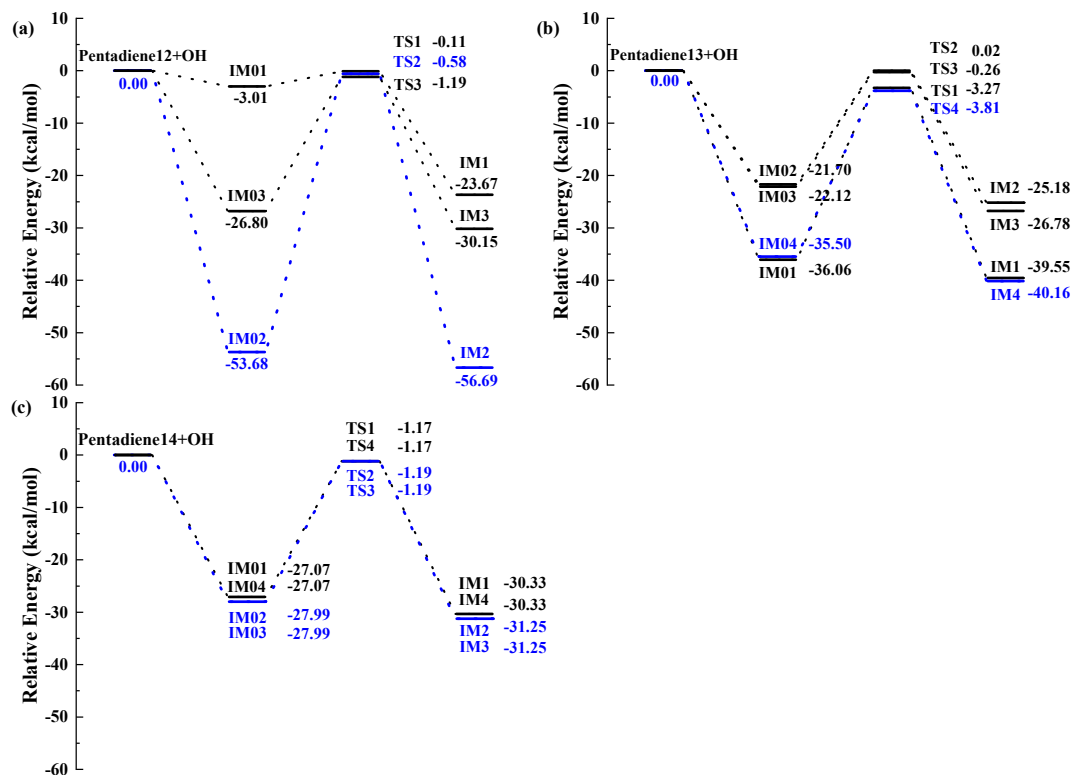

**Fig S3.** Plot of Potential energy surface (PES) for the addition reaction of 1,2-pentadiene (a), 1,3-pentadiene (b) and 1,4-pentadiene (c) with  $\cdot\text{OH}$ . The blue scheme represents the minimum energy path.

**Table S1.** Experimental conditions and reaction rate coefficients for 3M-1,3-PD, 1,4-HD and 1,2-PD with OH radicals at temperatures of 273-318 K.

| Diene     | T(K)          | Reference     | $\frac{k_{diene}}{k_{ref}}$ <sup>a</sup> | $k_{diene\_ref}^b$<br>10 <sup>-11</sup> cm <sup>3</sup><br>molecule <sup>-1</sup> s <sup>-1</sup> | $k_{av}^c$<br>10 <sup>-11</sup> cm <sup>3</sup><br>molecule <sup>-1</sup> s <sup>-1</sup> |
|-----------|---------------|---------------|------------------------------------------|---------------------------------------------------------------------------------------------------|-------------------------------------------------------------------------------------------|
| 3M-1,3-PD | 273           | propene       | 4.77±0.36                                | 14.66±3.14                                                                                        | 15.01±1.25                                                                                |
|           |               | 1,3-butadiene | 2.01±0.08                                | 15.35±3.13                                                                                        |                                                                                           |
|           | 288           | propene       | 5.87±0.06                                | 14.50±3.11                                                                                        | 14.86±1.22                                                                                |
|           |               | 1,3-butadiene | 1.96±0.01                                | 14.34±3.17                                                                                        |                                                                                           |
|           | 308           | propene       | 6.33±0.06                                | 15.77±3.16                                                                                        | 13.96±1.19                                                                                |
|           |               | 1,3-butadiene | 2.01±0.02                                | 12.77±2.56                                                                                        |                                                                                           |
| 318       | propene       | 6.32±0.03     | 14.94±3.00                               | 13.78±1.18                                                                                        |                                                                                           |
|           | 1,3-butadiene | 2.13±0.01     | 12.92±2.58                               |                                                                                                   |                                                                                           |
| 1,4-HD    | 273           | propene       | 4.09±0.04                                | 12.58±2.52                                                                                        | 11.74±1.09                                                                                |
|           |               | 1,3-butadiene | 1.45±0.02                                | 11.09±2.22                                                                                        |                                                                                           |
|           | 283           | propene       | 3.48±0.04                                | 10.02±2.01                                                                                        | 9.78±0.99                                                                                 |
|           |               | 1,3-butadiene | 1.33±0.01                                | 9.56±1.92                                                                                         |                                                                                           |
|           | 288           | propene       | 3.70±0.06                                | 10.31±2.07                                                                                        | 9.67±0.99                                                                                 |
|           |               | 1,3-butadiene | 1.31±0.01                                | 9.17±1.84                                                                                         |                                                                                           |
|           | 308           | propene       | 4.22±0.04                                | 10.52±2.11                                                                                        | 9.17±0.96                                                                                 |
|           |               | 1,3-butadiene | 1.31±0.01                                | 8.32±1.67                                                                                         |                                                                                           |
|           | 318           | propene       | 3.55±0.03                                | 8.40±1.68                                                                                         | 7.73±0.88                                                                                 |
|           |               | 1,3-butadiene | 1.20±0.01                                | 7.24±1.45                                                                                         |                                                                                           |
| 1,2-PD    | 273           | propene       | 1.74±0.12                                | 5.33±1.13                                                                                         | 4.96±0.73                                                                                 |
|           |               | 1,3-butadiene | 0.61±0.05                                | 4.67±1.00                                                                                         |                                                                                           |
|           | 283           | propene       | 1.72±0.03                                | 4.94±1.00                                                                                         | 4.81±0.70                                                                                 |
|           |               | 1,3-butadiene | 0.65±0.01                                | 4.69±0.94                                                                                         |                                                                                           |
|           | 288           | propene       | 1.63±0.08                                | 4.55±0.93                                                                                         | 4.24±0.66                                                                                 |
|           |               | 1,3-butadiene | 0.57±0.03                                | 4.00±0.84                                                                                         |                                                                                           |
|           | 308           | propene       | 1.47±0.02                                | 3.65±0.73                                                                                         | 3.23±0.57                                                                                 |
|           |               | 1,3-butadiene | 0.47±0.01                                | 2.96±0.59                                                                                         |                                                                                           |
|           | 318           | propene       | 1.42±0.02                                | 3.56±0.71                                                                                         | 3.12±0.56                                                                                 |
|           |               | 1,3-butadiene | 0.49±0.01                                | 3.06±0.62                                                                                         |                                                                                           |

<sup>a</sup>  $k_{ref}$  extracted from Calvert, Jack G. et al. “The Mechanisms of Atmospheric Oxidation of the Alkenes.” (2000)<sup>1</sup>.

$$\sigma_k = \frac{k}{k_{ref}} k_{ref} \sqrt{\left(\frac{\sigma_{ref}}{k_{ref}}\right)^2 + \left(\frac{\sigma_k/k_{ref}}{k_{ref}}\right)^2}$$

<sup>b</sup> The error was calculated as follows:

<sup>c</sup> Weighted average<sup>3</sup>  $k_{av} = (w_{diene\_ref1} k_{diene\_ref1} + w_{diene\_ref2} k_{diene\_ref2} + \dots) / (w_{diene\_ref1} + w_{diene\_ref2} + \dots)$ , where  $w_{diene\_ref1} = 1/\sigma_{diene\_ref1}^2$ , etc. The error,  $\sigma_{av}$ , was given by:  $\sigma_{av} = (1/\sigma_{diene\_ref1} + 1/\sigma_{diene\_ref2} + \dots)$   
-0.5

**Table S2.** Summary of activation parameters obtained with the Arrhenius and Eyring equations

| Diene  | T range (K) | Arrhenius parameters          |        | Eyring parameters                           |                                                           |
|--------|-------------|-------------------------------|--------|---------------------------------------------|-----------------------------------------------------------|
|        |             | $E_a$ (kJ mol <sup>-1</sup> ) | ln A   | $\Delta H^\ddagger$ (kJ mol <sup>-1</sup> ) | $\Delta S^\ddagger$ (JK <sup>-1</sup> mol <sup>-1</sup> ) |
| 3M13PD | 273-318     | -1.44                         | -23.24 | -3.91                                       | -446.39                                                   |
| 14HD   | 273-318     | -5.54                         | -25.35 | -7.99                                       | -463.88                                                   |
| 12PD   | 273-318     | -8.63                         | -27.51 | -11.09                                      | -481.84                                                   |

**Table S3.** The rate constants for the reaction of OH radicals with dienes and corresponding mono-alkenes are summarized based on a database at 298K and 1 atm and their structural formulae. The new SAR calculated values are listed at the end.

| Diene                   | Structure  | $k_{exp}^a$                                                       | Mono-alkene        | Structure | $k_{exp}^a$                                                          | $k_{cal}^c$                                                          | $k_{pred}$                                                           |
|-------------------------|------------|-------------------------------------------------------------------|--------------------|-----------|----------------------------------------------------------------------|----------------------------------------------------------------------|----------------------------------------------------------------------|
|                         |            | $10^{-11} \text{ cm}^3$<br>molecule <sup>-1</sup> s <sup>-1</sup> |                    |           | $10^{-11} \text{ cm}^3$<br>molecule <sup>-1</sup><br>s <sup>-1</sup> | $10^{-11} \text{ cm}^3$<br>molecule <sup>-1</sup><br>s <sup>-1</sup> | $10^{-11} \text{ cm}^3$<br>molecule <sup>-1</sup><br>s <sup>-1</sup> |
| 1,3-butadiene           | C=CC=C     | 6.63±1.00                                                         | 1-butene           | C=CCC     | 3.10±0.63                                                            | 6.20                                                                 | 6.97 <sup>d</sup>                                                    |
|                         |            |                                                                   | 1-butene           | C=CCC     | 3.10±0.63                                                            |                                                                      |                                                                      |
| isoprene                | C=C(C)C=C  | 10.00±1.48                                                        | 3-methyl-1-butene  | C=CC(C)C  | 3.18±0.64                                                            | 9.28                                                                 | 10.43 <sup>d</sup>                                                   |
|                         |            |                                                                   | 2-methyl-1-butene  | C=C(C)CC  | 6.10±1.83                                                            |                                                                      |                                                                      |
| (Z)-1,3-pentadiene      | C/C=C\C=C  | 10.70±2.68                                                        | 1-pentene          | C=CCCC    | 3.22±0.48                                                            | 9.72                                                                 | 10.92 <sup>d</sup>                                                   |
|                         |            |                                                                   | 2-pentene          | CC=CCC    | 6.50±2.00                                                            |                                                                      |                                                                      |
| (3E)-penta-1,3-diene    | C/C=C/C=C  | 11.60±4.35                                                        | 1-pentene          | C=CCCC    | 3.22±0.48                                                            | 9.72                                                                 | 10.92 <sup>d</sup>                                                   |
|                         |            |                                                                   | 2-pentene          | CC=CCC    | 6.50±2.00                                                            |                                                                      |                                                                      |
| 2-methyl-1,3-pentadiene | CC=CC(=C)C | 13.60±4.10                                                        | 2-methyl-1-pentene | C=C(C)CCC | 6.14±1.23                                                            | 12.24                                                                | 13.75 <sup>d</sup>                                                   |
|                         |            |                                                                   | 4-methyl-2-pentene | CC=CC(C)C | 6.10±1.83                                                            |                                                                      |                                                                      |
| (3E)-hexa-1,3-diene     | CC/C=C/C=C | 11.20±3.40                                                        | 1-hexene           | C=CCCCC   | 3.70±1.11                                                            | 9.97                                                                 | 11.20 <sup>d</sup>                                                   |
|                         |            |                                                                   | 3-hexene           | CCC=CCC   | 6.27±0.66                                                            |                                                                      |                                                                      |
| (Z/E)-2,4-hexadiene     | CC=CC=CC   | 13.40±4.02                                                        | 2-hexene           | CC=CCCC   | 6.08±1.22                                                            | 12.16                                                                | 13.66 <sup>d</sup>                                                   |
|                         |            |                                                                   | 2-hexene           | CC=CCCC   | 6.08±1.22                                                            |                                                                      |                                                                      |
| 1,4-pentadiene          | C=CCC=C    | 5.41±1.08                                                         | 1-pentene          | C=CCCC    | 3.22±0.48                                                            | 6.45                                                                 | 5.81 <sup>e</sup>                                                    |
|                         |            |                                                                   | 1-pentene          | C=CCCC    | 3.22±0.48                                                            |                                                                      |                                                                      |
| (E)-1,4-hexadiene       | C=CC/C=C/C | 9.10±2.73                                                         | 1-hexene           | C=CCCCC   | 3.70±1.11                                                            | 9.78                                                                 | 8.81 <sup>e</sup>                                                    |
|                         |            |                                                                   | 2-hexene           | CC=CCCC   | 6.08±1.22                                                            |                                                                      |                                                                      |
| 1,5-hexadiene           | C=CCCC=C   | 6.20±1.24                                                         | 1-hexene           | C=CCCCC   | 3.70±1.11                                                            | 7.4                                                                  | 6.67 <sup>e</sup>                                                    |
|                         |            |                                                                   | 1-hexene           | C=CCCCC   | 3.70±1.11                                                            |                                                                      |                                                                      |

|                                  |          |           |                      |                   |                        |      |                   |
|----------------------------------|----------|-----------|----------------------|-------------------|------------------------|------|-------------------|
| (Z/E)-1,4-hexadiene <sup>b</sup> | C=CCC=CC | 9.13±0.62 | 1-hexene<br>2-hexene | C=CCCC<br>CC=CCCC | 3.70±1.11<br>6.08±1.22 | 9.78 | 8.81 <sup>e</sup> |
|----------------------------------|----------|-----------|----------------------|-------------------|------------------------|------|-------------------|

<sup>a</sup>  $k_{exp}$  extracted from M. R. McGillen. et al. "Database for the kinetics of the gas-phase atmospheric reactions of organic compounds. " (2020)<sup>4</sup>.

<sup>b</sup> Rate constants from this work.

<sup>c</sup> The rate coefficients of conjugated diene and isolated diene reaction with OH radical by summing up the rate coefficients of corresponding mono-alkene that we derived by converting one C=C bond to a C-C bond, e.g., 1,4-hexadiene → 1-hexene + 2-hexene. In this way,  $k_{cal\_1,4\text{-hexadiene}} = k_{1\text{-hexene}} + k_{2\text{-hexene}}$ .

<sup>d</sup> and <sup>e</sup> The  $k_{pred}$  is obtained by multiplying  $k_{cal}$  by the factors of 0.89 and 1.11, respectively, derived from Fig 5. for conjugated and isolated dienes.



**Table S4.** The number of carbon atoms and the rate coefficients for the reaction with OH of a series of straight-chain dienes including cumulated diene (C=C=C), conjugated diene (C=C-C=C), and isolated diene (C=C-(C)<sub>n</sub>-C=C, n ≥ 1).

| Diene                          | Number of carbon atoms | Rate coefficients (cm <sup>3</sup> molecule <sup>-1</sup> s <sup>-1</sup> ) <sup>a</sup> |
|--------------------------------|------------------------|------------------------------------------------------------------------------------------|
|                                |                        | 10 <sup>-11</sup> cm <sup>3</sup> molecule <sup>-1</sup> s <sup>-1</sup>                 |
| <b>C=C=C</b>                   |                        |                                                                                          |
| Propadiene                     | 3                      | 0.98±0.20                                                                                |
| 1,2-butadiene                  | 4                      | 2.60±0.80                                                                                |
| 1,2-pentadiene                 | 5                      | 3.60±1.10                                                                                |
| <b>C=C-C=C</b>                 |                        |                                                                                          |
| 1,3-butadiene                  | 4                      | 6.63±1.00                                                                                |
| (Z)-1,3-pentadiene             | 5                      | 10.70±2.68                                                                               |
| (3E)-penta-1,3-diene           | 5                      | 11.60±4.35                                                                               |
| (3E)-hexa-1,3-diene            | 6                      | 11.20±3.40                                                                               |
| (Z/E)-2,4-hexadiene            | 6                      | 13.40±4.02                                                                               |
| <b>C=C-(C)<sub>n</sub>-C=C</b> |                        |                                                                                          |
| 1,4-pentadiene                 | 5                      | 5.41±1.08                                                                                |
| (E)-1,4-hexadiene              | 6                      | 9.10±2.73                                                                                |
| 1,5-hexadiene                  | 6                      | 6.20±1.24                                                                                |

<sup>a</sup> The rate coefficients of dienes reacting with the OH extracted from M. R. McGillen. et al. "Database for the kinetics of the gas-phase atmospheric reactions of organic compounds. " (2020)<sup>4</sup>

**Table S5.** The relationship of rate coefficients of dienes reaction with OH radical vs the number of alkyl groups on the diene.

| Diene                          | Structure          | $k_{exp}^a$<br>$10^{-11} \text{ cm}^3 \text{ molecule}^{-1} \text{ s}^{-1}$ | alkyl groups on the<br>base structures <sup>c</sup> |
|--------------------------------|--------------------|-----------------------------------------------------------------------------|-----------------------------------------------------|
| <b>C=C=C</b>                   |                    |                                                                             |                                                     |
| Propadiene                     | C=C=C              | 0.98±0.20                                                                   | <b>C=C=C</b>                                        |
| 1,2-butadiene                  | C=C=CC             | 2.60±0.80                                                                   | -CH <sub>3</sub>                                    |
| 3-methyl-1,2-butadiene         | C=C=C(C)C          | 5.70±1.71                                                                   | 2*-CH <sub>3</sub>                                  |
| 1,2-pentadiene                 | CCC=C=C            | 3.34±0.40 <sup>b</sup>                                                      | -CH <sub>2</sub> CH <sub>3</sub>                    |
| <b>C=C-C=C</b>                 |                    |                                                                             |                                                     |
| 1,3-butadiene                  | C=CC=C             | 6.63±1.00                                                                   | <b>C=C-C=C</b>                                      |
| isoprene                       | C=C(C)C=C          | 10.00±1.48                                                                  | -CH <sub>3</sub>                                    |
| (Z)-1,3-pentadiene             | C/C=C\C=C          | 10.70±2.68                                                                  | -CH <sub>3</sub>                                    |
| (3E)-penta-1,3-diene           | C/C=C/C=C          | 11.60±4.35                                                                  | -CH <sub>3</sub>                                    |
| 4-methyl-1,3-pentadiene        | C=CC=C(C)C         | 13.10±3.93                                                                  | 2*-CH <sub>3</sub>                                  |
| 2,3-dimethyl-1,3-butadiene     | CC(=C)C(=C)C       | 12.20±3.70                                                                  | 2*-CH <sub>3</sub>                                  |
| 2-methyl-1,3-pentadiene        | CC=CC(=C)C         | 13.60±4.10                                                                  | 2*-CH <sub>3</sub>                                  |
| (3E)-hexa-1,3-diene            | CC/C=C/C=C         | 11.20±3.40                                                                  | -CH <sub>2</sub> CH <sub>3</sub>                    |
| (Z/E)-2,4-hexadiene            | CC=CC=CC           | 13.40±4.02                                                                  | 2*-CH <sub>3</sub>                                  |
| 3-methyl-1,3-pentadiene        | C=CC(C)=CC         | 15.09±0.72 <sup>b</sup>                                                     | 2*-CH <sub>3</sub>                                  |
| 2,5-dimethyl-2,4-hexadiene     | CC(=CC=C(C)C)<br>C | 2.10±0.63                                                                   | 4*-CH <sub>3</sub>                                  |
| <b>C=C-(C)<sub>n</sub>-C=C</b> |                    |                                                                             |                                                     |
| 1,4-pentadiene                 | C=CCC=C            | 5.41±1.08                                                                   | <b>C=C-C-C=C</b>                                    |
| 2-methyl-1,4-pentadiene        | C=CCC(=C)C         | 7.90±2.40                                                                   | -CH <sub>3</sub>                                    |
| (E)-1,4-hexadiene              | C=CC/C=C/C         | 9.10±2.73                                                                   | -CH <sub>3</sub>                                    |
| 1,5-hexadiene                  | C=CCCC=C           | 6.20±1.24                                                                   | <b>C=C-C-C-C=C</b>                                  |

|                            |                |                        |                    |
|----------------------------|----------------|------------------------|--------------------|
| (Z/E)-1,4-hexadiene        | C=CCC=CC       | 9.13±0.62 <sup>b</sup> | -CH <sub>3</sub>   |
| 2,5-dimethyl-1,5-hexadiene | CC(=C)CCC(=C)C | 12.00±3.60             | 2*-CH <sub>3</sub> |

<sup>a</sup>  $k_{exp}$  extracted from M. R. McGillen. et al. "Database for the kinetics of the gas-phase atmospheric reactions of organic compounds. " (2020)<sup>4</sup>.

<sup>b</sup> Rate constants from this work.
